# Supplementary material for: Interpreting Randomized Controlled Trials
Source: Preprints.org preprint supplement (doi:10.20944/preprints202309.0093.v1), 2023-09-04
Supplement: Supplementary file 1 [file supplementary]

## Sheet: P-values
p-value	S-value	Bits of information against the tested hypothesis
0.05	4.32193	4

## Sheet: Confidence intervals
Confidence level (%)	S-value	Maximum bits of information against the values contained within the interval
95	4.32193	4

## Sheet: CI bits against the null
Point estimate	Lower confidence limit	Upper confidence limit	Confidence level (%)
0.81	0.7	0.94	95
Standard error (SE)	P-value for the null hypothesis	S-value	Bits of information against the null hypothesis
0.0752053	0.00511817	7.61016	8
